# Supplementary material
Source: Springer Nature journal article supplement (https://www.springermedizin.de/resource/supplementary/13058_2012_2989_MOESM7_ESM.pdf/9703038)

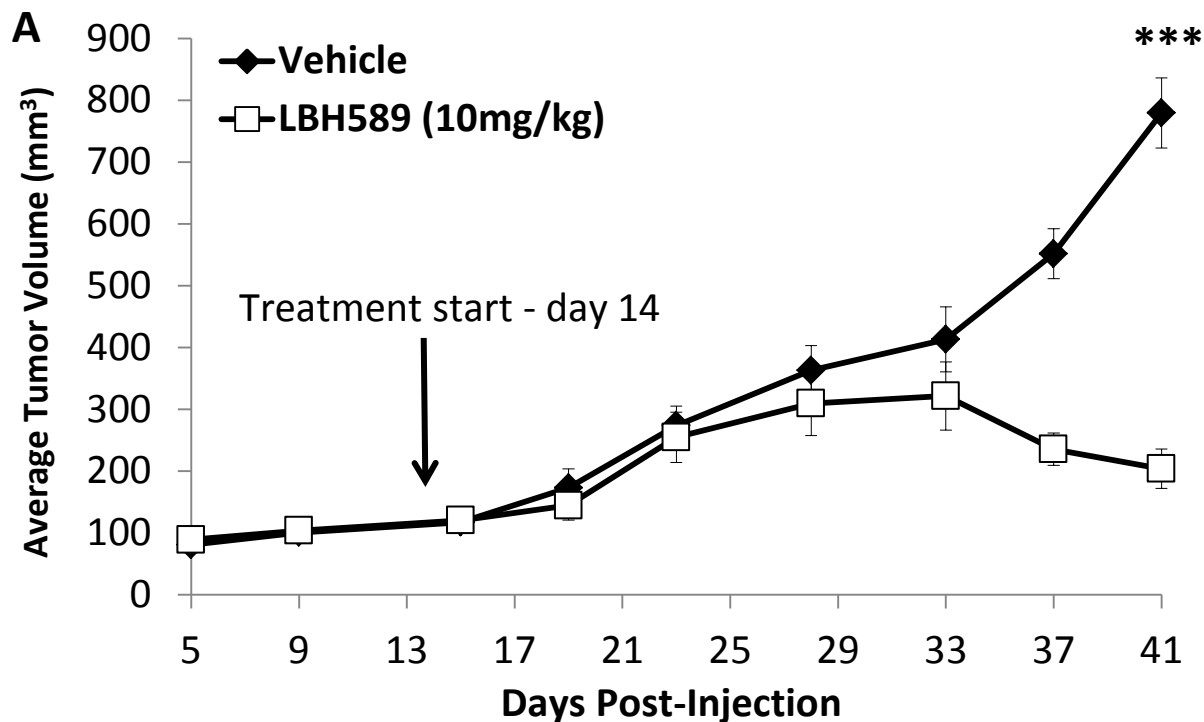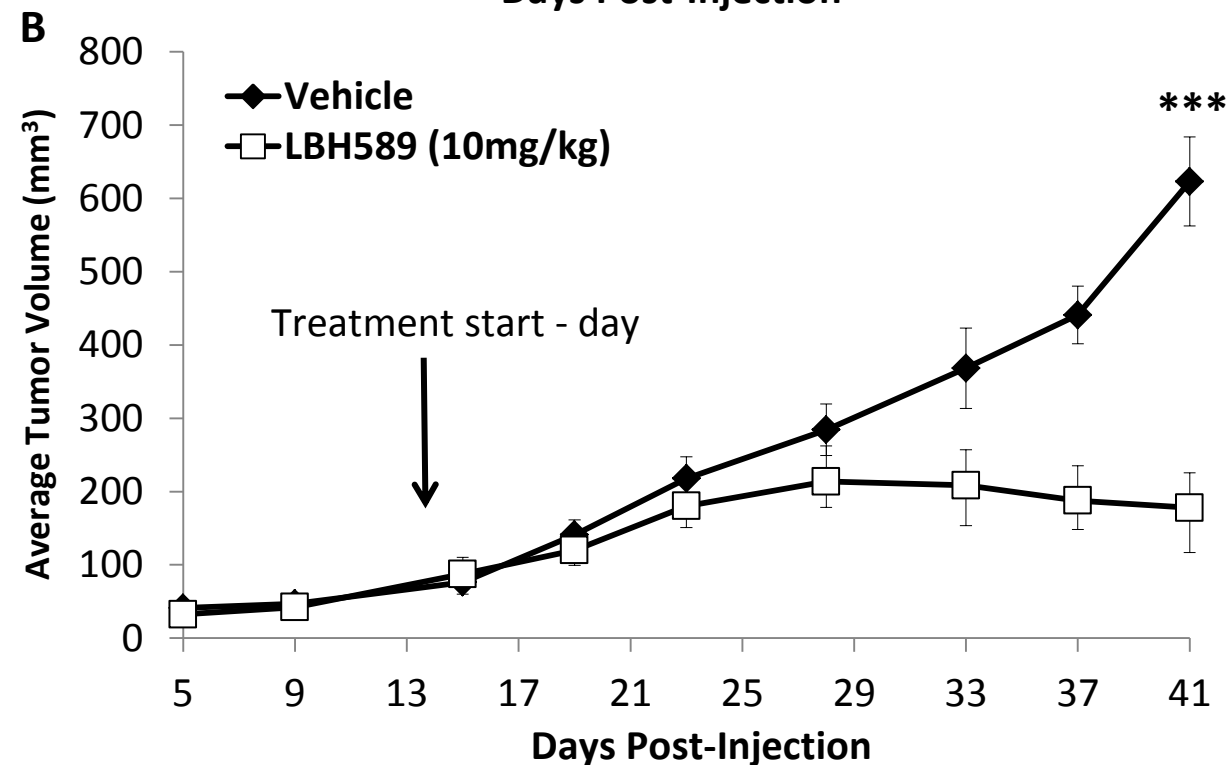

Supplement: MOESM7 [file 9703038]
